# Supplementary material for: Relationship between mitochondrial changes and seed aging as a limitation of viability for the storage of beech seed (Fagus sylvatica L.)
Source: PeerJ. 2021 Jan 19;9:e10569. doi: 10.7717/peerj.10569 (PMC7821764; doi:10.7717/peerj.10569)
Supplement: Supplemental Information 1 [file peerj-09-10569-s001.xlsx]

## Sheet: Arkusz1
	year	Catalase	H2O2	MDA	germination
cotyledons	2000	0.154	0.759	12.695	25
cotyledons	2000	0.19	1.546	7.084	30
cotyledons	2000	0.131	0.711	6.247	25
cotyledons	2006	0.251	1.166	2.3	68
cotyledons	2006	0.29	0.904	3.25	65
cotyledons	2006	0.21	0.708	2.1	65
cotyledons	2009	0.154	0.514	1.49	90
cotyledons	2009	0.104	0.573	1.93	90
cotyledons	2009	0.095	0.488	1.77	85
cotyledons	2017	0.152	0.132	1.793	95
cotyledons	2017	0.171	0.137	1.32	98
cotyledons	2017	0.191	0.134	1.6	97
embryo axe	2000	0.283	1.648	11.525	25
embryo axe	2000	0.354	1.583	9.79	30
embryo axe	2000	0.165	2.52	10.55	25
embryo axe	2006	0.203	2.269	8.83	68
embryo axe	2006	0.42	2.459	13.3	65
embryo axe	2006	0.43	1.221	11.01	65
embryo axe	2009	0.728	1.172	5.775	90
embryo axe	2009	0.57	0.615	10.329	90
embryo axe	2009	0.516	1.465	8	85
embryo axe	2017	0.402	0.06	2.11	95
embryo axe	2017	0.516	0.055	1.033	98
embryo axe	2017	0.487	0.063	1.6	97
